# Supplementary material for: Rapid assessment of platinum disk ultramicroelectrodes' sealing quality by a cyclic voltammetry approach
Source: Royal Society of Chemistry journal article supplement (doi:10.1039/d0ay00649a), 2020-01-01
Supplement: d0ay00649a1.pdf [file d0ay00649a1.pdf]

Supplementary information for

**Rapid Assessment of Platinum Disk Ultramicroelectrodes Sealing Quality by  
Cyclic Voltammetry Approach**

Nataraju Bodappa<sup>†‡</sup>

<sup>†</sup>Center for Electrochemistry, Department of Chemistry, The University of Texas at Austin,  
Austin, Texas 78712, United States.

**Corresponding Author**

natarajubodappa@gmail.com

**Present Addresses**

<sup>‡</sup> Department of Chemistry, University of Waterloo, 200 University Avenue W., Waterloo,  
Ontario, Canada

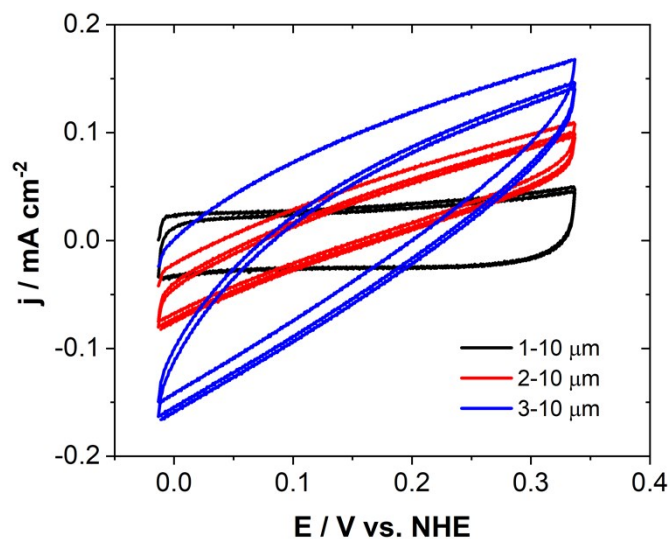

**Figure S1.** Full length CVs of 10  $\mu\text{m}$  diameter Pt disk UMEs in 0.1 M phosphate buffer (pH = 7).

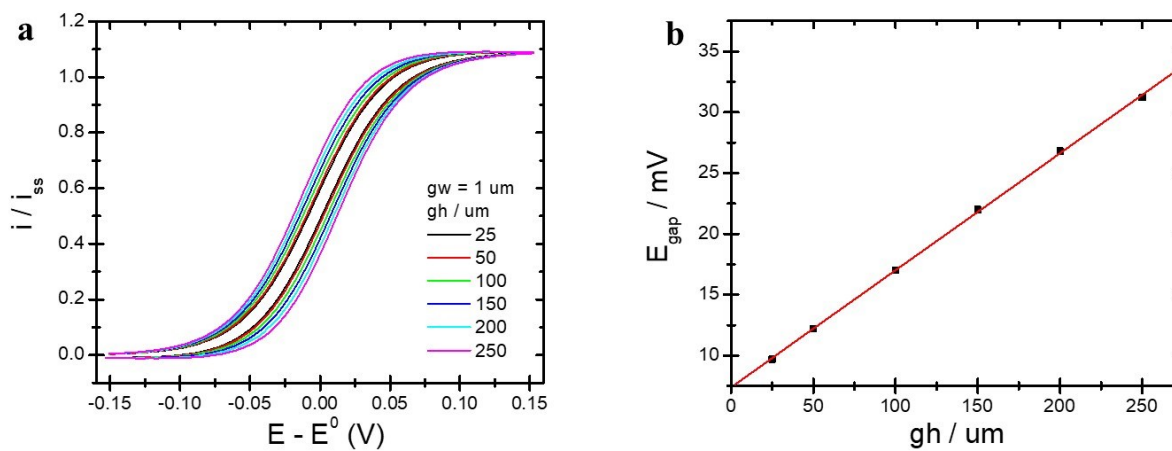

**Figure S2.** (a) COMSOL simulated CVs for varying gap height as indicated in the inset. (b) Effect of hysteresis observed by varying gap height, data taken from figure (a). Parameters used are;  $a = 5 \mu\text{m}$ ,  $D = 7.5 \times 10^{-6} \text{ cm}^2/\text{s}$ ,  $v = 0.025 \text{ V/s}$ .

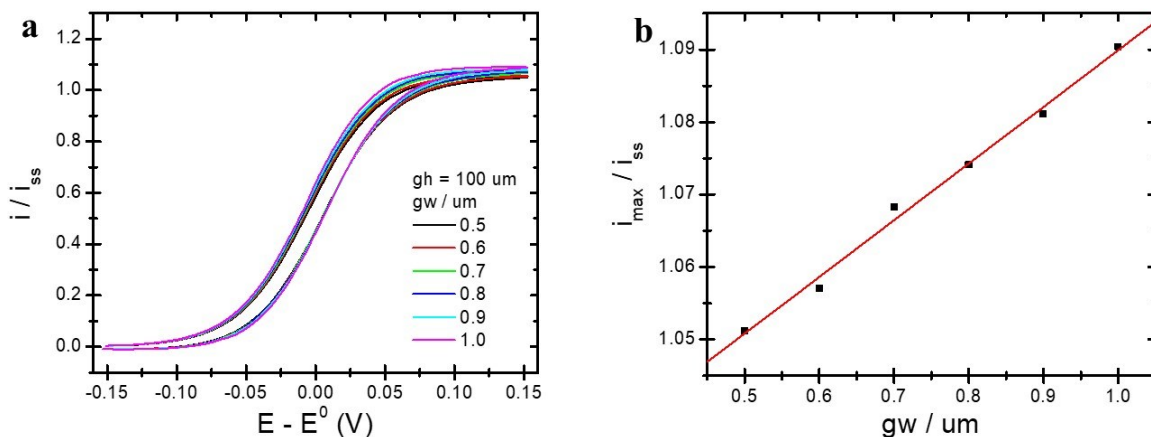

**Figure S3.** (a) COMSOL simulated CVs for varying gap width as indicated in the inset. (b) Effect of steady state currents observed by varying gap width, data taken from figure (a). Parameters used are;  $a = 5 \mu\text{m}$ ,  $D = 7.5 \times 10^{-6} \text{ cm}^2/\text{s}$ ,  $v = 0.025 \text{ V/s}$ .

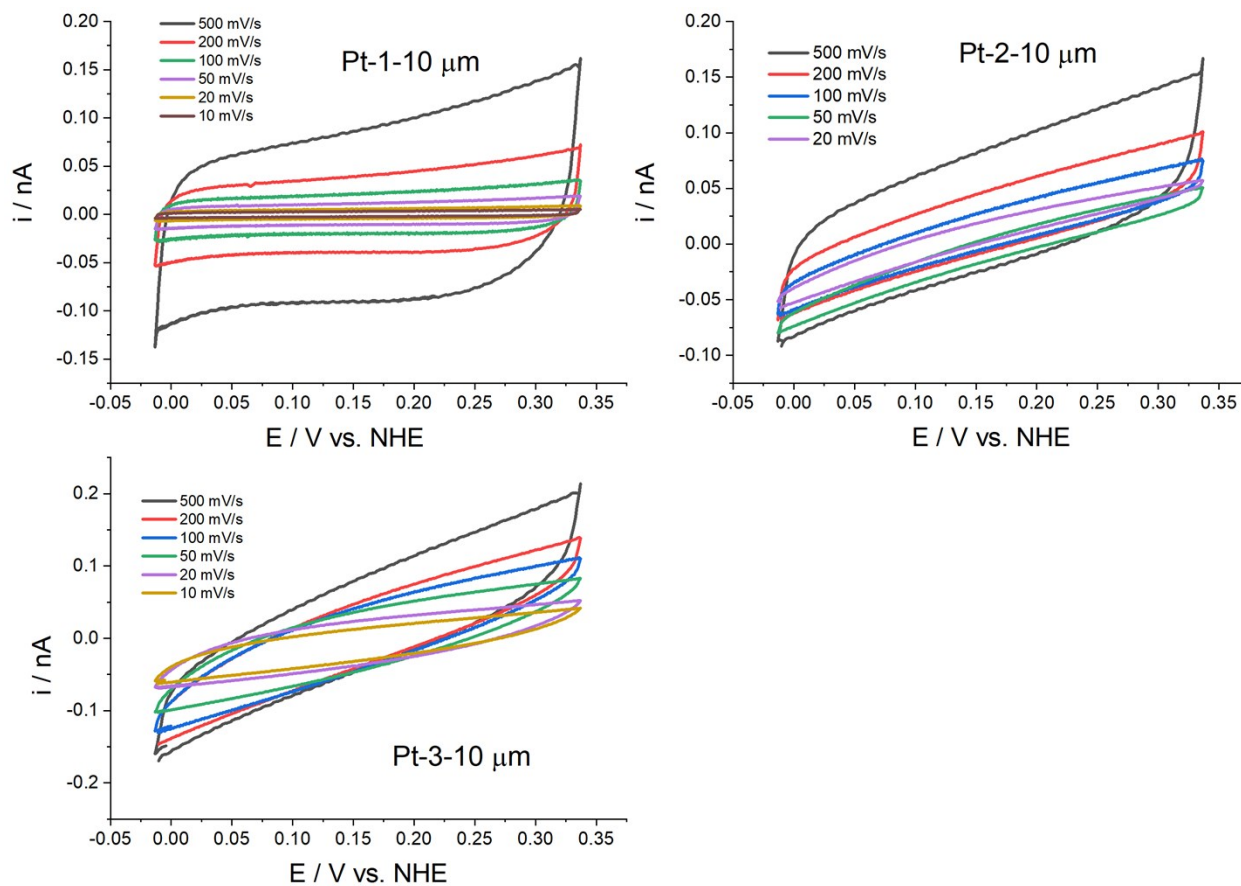

**Figure S4.** Variation of scan rates for  $10 \mu\text{m}$  Pt disk UMEs in  $0.1 \text{ M}$  phosphate buffer ( $\text{pH} = 7$ ).

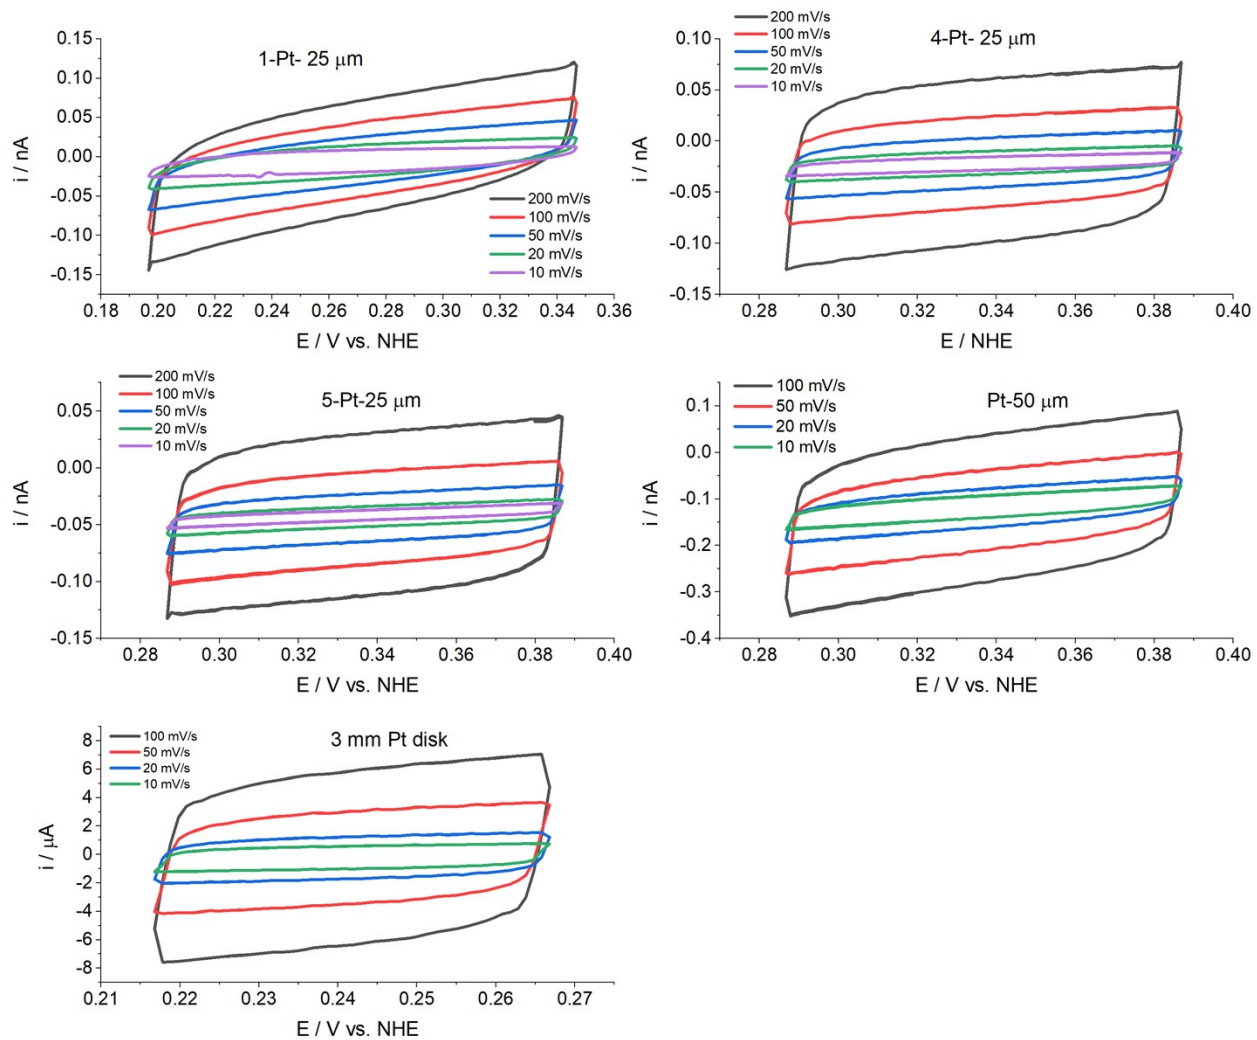

**Figure S5.** Variation of scan rates for 25  $\mu\text{m}$ , 50  $\mu\text{m}$  and 3 mm Pt disk electrodes in 0.1 M  $\text{KClO}_4$  + 0.1 mM  $\text{HClO}_4$ .

**Report date**

Jun 7, 2020 12:19:54 PM

## USED PRODUCTS

|                     |
|---------------------|
| COMSOL Multiphysics |
|---------------------|

**1.1 PARAMETERS 1**

## PARAMETERS

| Name | Expression                | Value  | Description |
|------|---------------------------|--------|-------------|
| RG   | 20                        | 20     |             |
| gw   | 0.2                       | 0.2    |             |
| gh   | 20                        | 20     |             |
| xi   | 1                         | 1      |             |
| ei   | -6                        | -6     |             |
| ef   | 6                         | 6      |             |
| v    | 0.0324                    | 0.0324 |             |
| tf   | $2*\text{abs}(ei - ef)/v$ | 740.74 |             |
| df   | $6*\text{sqrt}(tf)$       | 163.3  |             |

## 2 Component 1

### 2.1 DEFINITIONS

#### 2.1.1 Functions

##### Triangle

|               |          |
|---------------|----------|
| Function name | tri      |
| Function type | Triangle |

*Triangle*

##### Potential

|               |          |
|---------------|----------|
| Function name | eps      |
| Function type | Analytic |

*Potential*

##### Psi

|               |          |
|---------------|----------|
| Function name | psi      |
| Function type | Analytic |

*Psi*

#### 2.1.2 Probes

##### Global Variable Probe 2

|            |                       |
|------------|-----------------------|
| Probe type | Global variable probe |
|------------|-----------------------|

##### Current Probe

|            |                       |
|------------|-----------------------|
| Probe type | Global variable probe |
|------------|-----------------------|

#### 2.1.3 Component Couplings

##### Integration 1

|               |             |
|---------------|-------------|
| Coupling type | Integration |
| Operator name | elecInt     |

#### 2.1.4 Coordinate Systems

##### Boundary System 1

|                        |                 |
|------------------------|-----------------|
| Coordinate system type | Boundary system |
| Tag                    | sys1            |

## 2.2 GEOMETRY 1

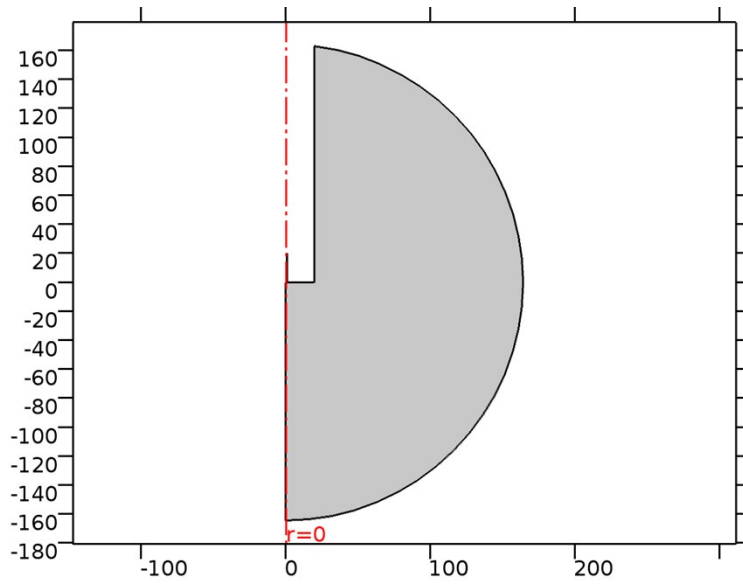

*Geometry 1*

## 2.3 COEFFICIENT FORM PDE

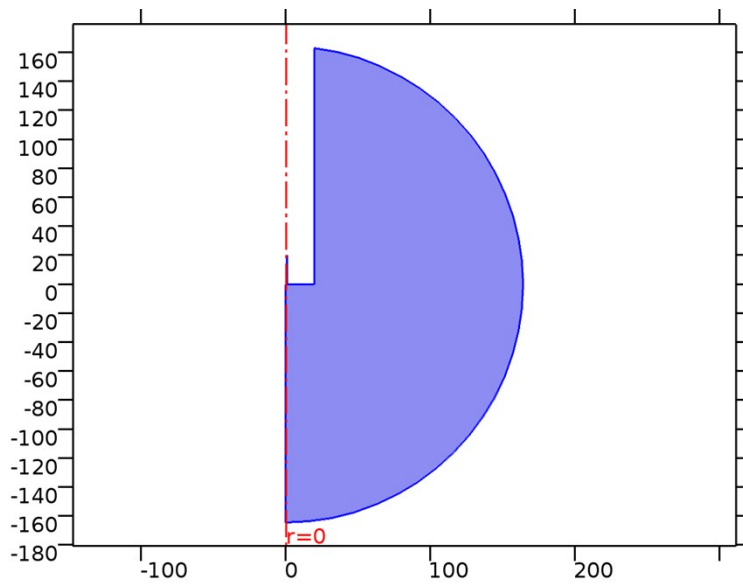

*Coefficient Form PDE*

### FEATURES

|                   |
|-------------------|
| Diffusion Eq.     |
| Glass             |
| Initial Values    |
| Electrode Surface |
| Bulk              |

### 2.3.1 Diffusion Eq.

EQUATIONS

$$e_a \frac{\partial^2 \mathbf{u}}{\partial t^2} + d_a \frac{\partial \mathbf{u}}{\partial t} + \nabla \cdot (-c \nabla \mathbf{u} - \alpha \mathbf{u} + \gamma) + \beta \cdot \nabla \mathbf{u} + a \mathbf{u} = f$$

$$\mathbf{u} = [cO, cR]^T$$

$$\nabla = \left[ \frac{\partial}{\partial r}, \frac{\partial}{\partial z} \right]$$

### 2.3.2 Glass

EQUATIONS

$$-n \cdot (-c \nabla \mathbf{u} - \alpha \mathbf{u} + \gamma) = 0$$

$$\mathbf{u} = [cO, cR]^T$$

$$\nabla = \left[ \frac{\partial}{\partial r}, \frac{\partial}{\partial z} \right]$$

### 2.3.3 Electrode Surface

EQUATIONS

$$\mathbf{u} = r$$

$$\mathbf{u} = [cO, cR]^T$$

$$g_{\text{reaction}} = -\mu$$

$$\mu = [\mu_1, \mu_2]^T$$

### 2.3.4 Bulk

EQUATIONS

$$\mathbf{u} = r$$

$$\mathbf{u} = [cO, cR]^T$$

$$g_{\text{reaction}} = -\mu$$

$$\mu = [\mu_1, \mu_2]^T$$



## 2.4 MESH 1

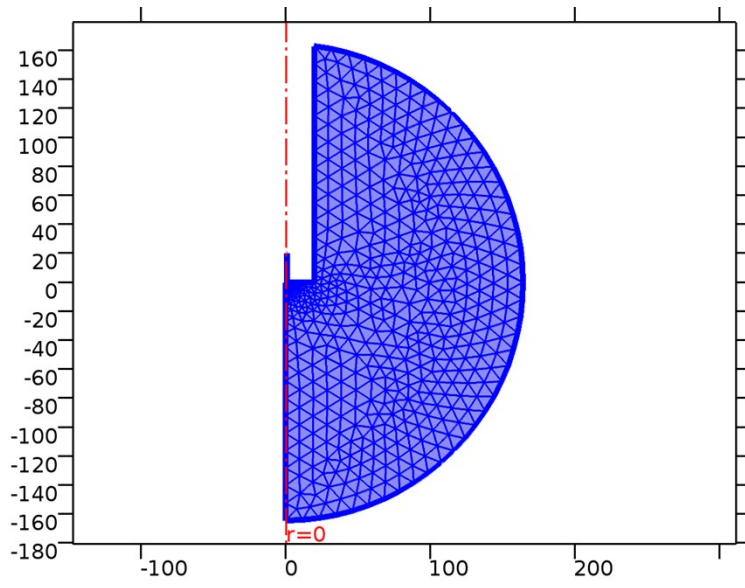

*Mesh 1*

### 3 Study 1

#### COMPUTATION INFORMATION

|                  |                                                   |
|------------------|---------------------------------------------------|
| Computation time | 2 min 34 s                                        |
| CPU              | Intel(R) Core(TM) i5-4590S CPU @ 3.00GHz, 4 cores |
| Operating system | Windows 10                                        |

#### 3.1 PARAMETRIC SWEEP

| Parameter name | Parameter value list        |
|----------------|-----------------------------|
| gh             | 20                          |
| gw             | 0.1 0.12 0.14 0.16 0.18 0.2 |

#### STUDY SETTINGS

| Description          | Value                             |
|----------------------|-----------------------------------|
| Sweep type           | All combinations                  |
| Parameter name       | {gh, gw}                          |
| Parameter value list | {20, 0.1 0.12 0.14 0.16 0.18 0.2} |
| Unit                 | {, }                              |

#### 3.2 TIME DEPENDENT

| Times         |
|---------------|
| range(0,4,tf) |

#### STUDY SETTINGS

| Description                    | Value |
|--------------------------------|-------|
| Include geometric nonlinearity | Off   |

#### PHYSICS AND VARIABLES SELECTION

| Physics interface        | Discretization |
|--------------------------|----------------|
| Coefficient Form PDE (c) | physics        |

#### MESH SELECTION

| Geometry           | Mesh  |
|--------------------|-------|
| Geometry 1 (geom1) | mesh1 |
